# Supplementary material for: Improving the teaching of entropy and the second law of thermodynamics: a systematic review with meta-analysis
Source: Royal Society of Chemistry journal article supplement (doi:10.1039/d4rp00158c), 2024-09-10

# Electronic Supplementary Information

## Appendix A. List of included articles from the author's own database and not from the ERIC or Scopus database search

Ben-Naim, A. (2011). Entropy : Order or Information. *Journal of Chemical Education*, 88(5), 594-596. <https://doi.org/10.1021/ed100922x>

Bindel, T. H. (2007). Discovering the Thermodynamics of Simultaneous Equilibria. An Entropy Analysis Activity Involving Consecutive Equilibria. *Journal of Chemical Education*, 84(3), 449-452. <https://doi.org/10.1021/ed084p449>

Bindel, T. H. (2010). Understanding Chemical Equilibrium Using Entropy Analysis : The Relationship Between  $\Delta S_{\text{tot}}$  (sys $^\circ$ ) and the Equilibrium Constant. *Journal of Chemical Education*, 87(7), 694-699. <https://doi.org/10.1021/ed100192q>

Craig, N. C. (1988). Entropy analyses of four familiar processes. *Journal of Chemical Education*, 65(9), 760-764. <https://doi.org/10.1021/ed065p760>

Gary, R. K. (2004). The Concentration Dependence of the  $\Delta S$  Term in the Gibbs Free Energy Function : Application to Reversible Reactions in Biochemistry. *Journal of Chemical Education*, 81(11), 1599-1604. <https://doi.org/10.1021/ed081p1599>

Hazelhurst, T., A. (1931). Exorcising a Spectre : Entropy. *Journal of Chemical Education*, 8(3), 498-503.

Jungermann, A. H. (2006). Entropy and the Shelf Model : A Quantum Physical Approach to a Physical Property. *Journal of Chemical Education*, 83(11), 1686-1694. <https://doi.org/10.1021/ed083p1686>

Kozliak, E. I. (2014). Entropy of Mixing of Distinguishable Particles. *Journal of Chemical Education*, 91(6), 834-838. <https://doi.org/10.1021/ed4007666>

Laird, B. B. (1999). Entropy, Disorder, and Freezing. *Journal of Chemical Education*, 76(10), 1388-1390. <https://doi.org/10.1021/ed076p1388>

Lechner, J. H. (1999). Visualizing Entropy. *Journal of Chemical Education*, 76(10), 1382-1385. <https://doi.org/10.1021/ed076p1382>

Leff, H. S. (1996). Thermodynamic Entropy : The Spreading and Sharing of Energy. *American Journal of Physics*, 64(10), 1261-1271. <https://doi.org/10.1119/1.18389>

Novak, I. (2003). The Microscopic Statement of the Second Law of Thermodynamics. *Journal of Chemical Education*, 80(12), 1428-1431. <https://doi.org/10.1021/ed080p1428>

Plumb, R. C. (1964). Teaching the entropy concept. *Journal of Chemical Education*, 41(5), 254-256. <https://doi.org/10.1021/ed041p254>

Salagaram, T., & Chetty, N. (2011). Enhancing the understanding of entropy through computation. *American Journal of Physics*, 79(11), 1127-1132. <https://doi.org/10.1119/1.3623416>

Schoepf, D. C. (2002). A statistical development of entropy for the introductory physics course. *American Journal of Physics*, 70(2), 128-136. <https://doi.org/10.1119/1.1419097>

## Appendix B. Articles that were rejected for a reason that needs to be explicitly mentioned, because it could appear as unclear to the reader

| Reference                                                                                                                                                                                                                                                                                                                                                                   | Reason for exclusion                                                                                                                               |
|-----------------------------------------------------------------------------------------------------------------------------------------------------------------------------------------------------------------------------------------------------------------------------------------------------------------------------------------------------------------------------|----------------------------------------------------------------------------------------------------------------------------------------------------|
| Abell, T. N., & Bretz, S. L. (2019). Macroscopic Observations of Dissolving, Insolubility, and Precipitation : General Chemistry and Physical Chemistry Students' Ideas about Entropy Changes and Spontaneity. <i>Journal of Chemical Education</i> , 96(3), 469-478. <a href="https://doi.org/10.1021/acs.jchemed.8b01007">https://doi.org/10.1021/acs.jchemed.8b01007</a> | Entropy is not the core of the teaching solution, the authors focus more on general thermodynamics teaching, with no specific teaching for entropy |
| Banerjee, A. C. (1995). Teaching Chemical Equilibrium and Thermodynamics in Undergraduate General Chemistry Classes. <i>Journal of Chemical Education</i> , 72(10), 879-881. <a href="https://doi.org/10.1021/ed072p879">https://doi.org/10.1021/ed072p879</a>                                                                                                              | Entropy teaching is only marginally addressed, it is not the main goal of the article                                                              |
| DeVoe, H. (2013). A Comparison of Local and Global Formulations of Thermodynamics. <i>Journal of Chemical Education</i> , 90(5), 591-597. <a href="https://doi.org/10.1021/ed300797j">https://doi.org/10.1021/ed300797j</a>                                                                                                                                                 | The article focusses on four examples, one of which is electrochemical, the others highlighting more enthalpy than entropy                         |
| Liff, M. I. (2010). Another Demo of the Unusual Thermal Properties of Rubber. <i>The Physics Teacher</i> , 48(7), 444-446. <a href="https://doi.org/10.1119/1.3488185">https://doi.org/10.1119/1.3488185</a>                                                                                                                                                                | The authors aim at investigating misconceptions, not proposing a new way of teaching                                                               |
| Samiullah, M. (2007). What is a reversible process? <i>American Journal of Physics</i> , 75(7), 608-609. <a href="https://doi.org/10.1119/1.2721588">https://doi.org/10.1119/1.2721588</a>                                                                                                                                                                                  | The focus of the article is to establish the link between reversibility and entropy, not to teach entropy better                                   |

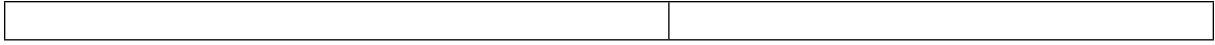

Supplement: d4rp00158c1.pdf [file d4rp00158c1.pdf]
